# Supplementary material
Source: publisher figshare collection journal article supplement (https://acs.figshare.com/ndownloader/files/28896892)
Supplement: Supplementary file 1 [file 28896892]

# Integrated Extraction and Catalytic Upgrading of Bio-Crude Oil from Co-Hydrothermal Liquefaction of Crude Glycerol and Algae

Zheng Cui<sup>1</sup>, Feng Cheng<sup>2</sup>, Jacqueline M. Jarvis<sup>3</sup>, Umakanta Jena<sup>1\*</sup>, Catherine E. Brewer<sup>1</sup>

Supplemental information

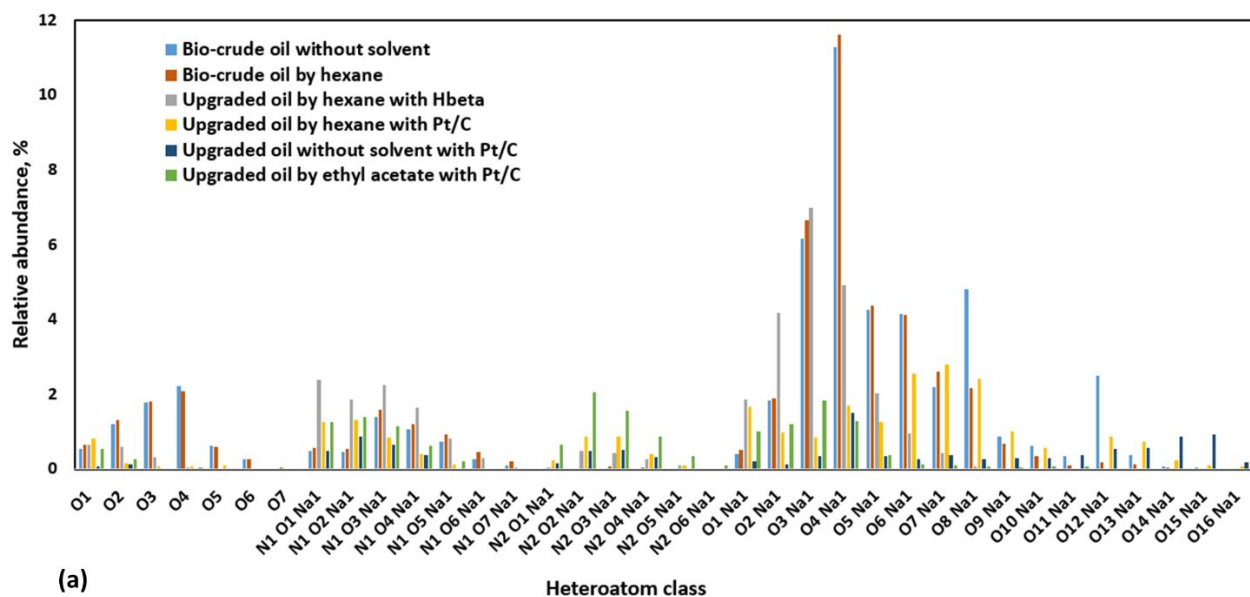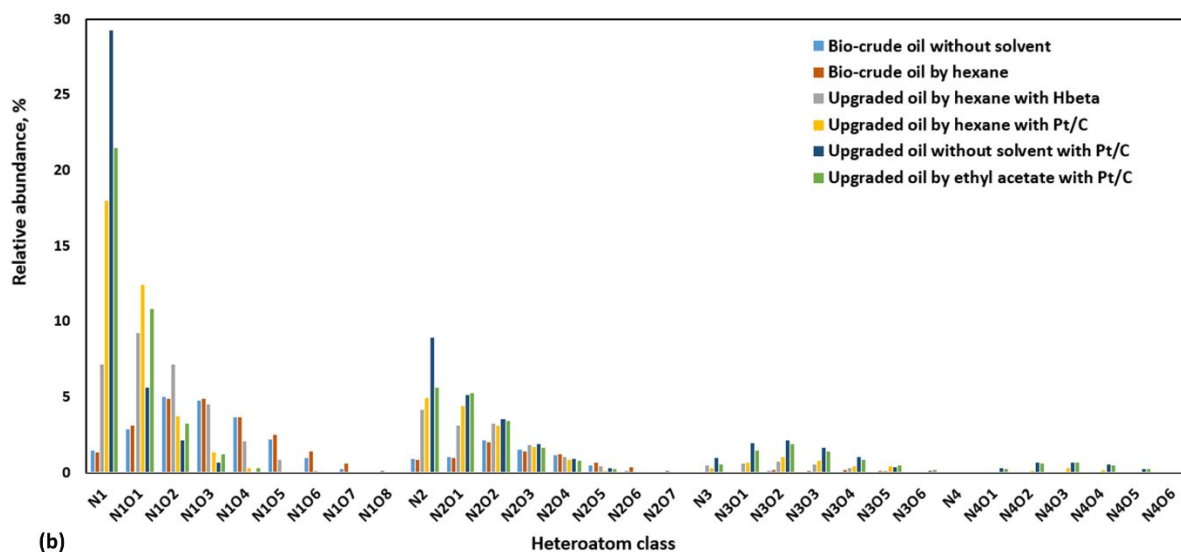

Figure S1. Detailed heteroatom class distributions of extracted bio-crude oils and upgraded oils from extraction and/or upgrading with different solvents and catalysts; data derived from positive-ion ESI FT-ICR MS.
